# Supplementary material
Source: HighWire-hosted journal article supplement (https://jitc.bmj.com/content/12/10/e009803)
Supplement: inline-supplementary-material-2 [file inline-supplementary-material-2.pdf]

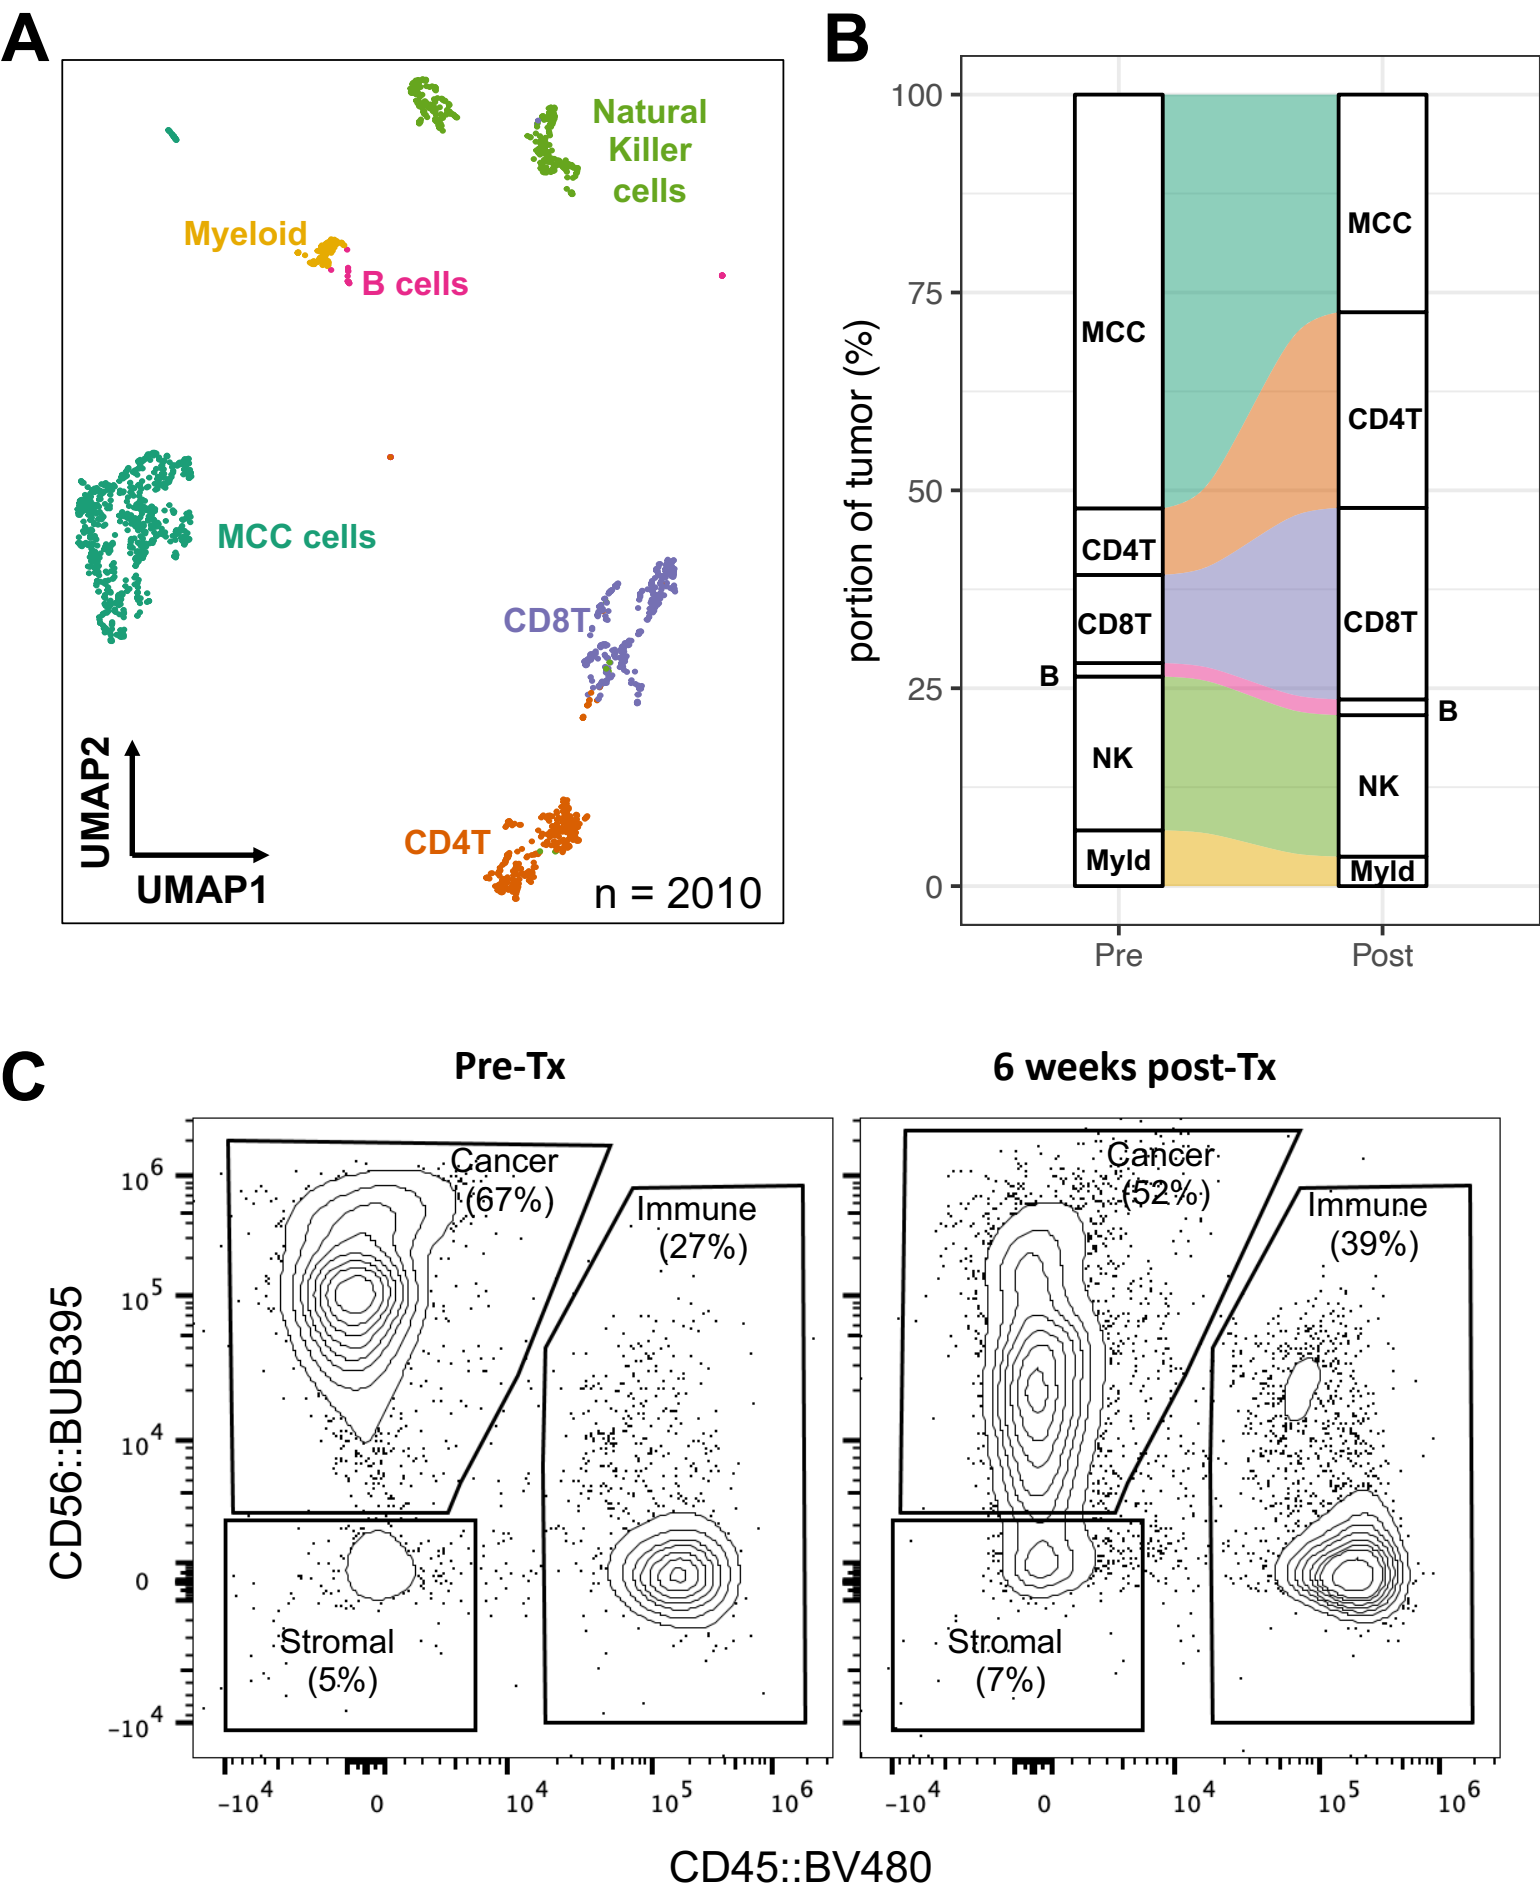

**Supplemental Figure 2. T cells increase in tumor following STING agonism as measured via single cell RNAseq.**

A. UMAP plot of single cell RNAseq of pre and post-treatment tumor samples.

B. Alluvium plot showing changes in cell populations after treatment.

C. FACS plot confirming trends seen in Figure 2C and supplemental figure 2B. Cells gated on live singlets.
