# Supplementary material
Source: HighWire-hosted journal article supplement (https://jitc.bmj.com/content/12/10/e009803)
Supplement: inline-supplementary-material-5 [file inline-supplementary-material-5.pdf]

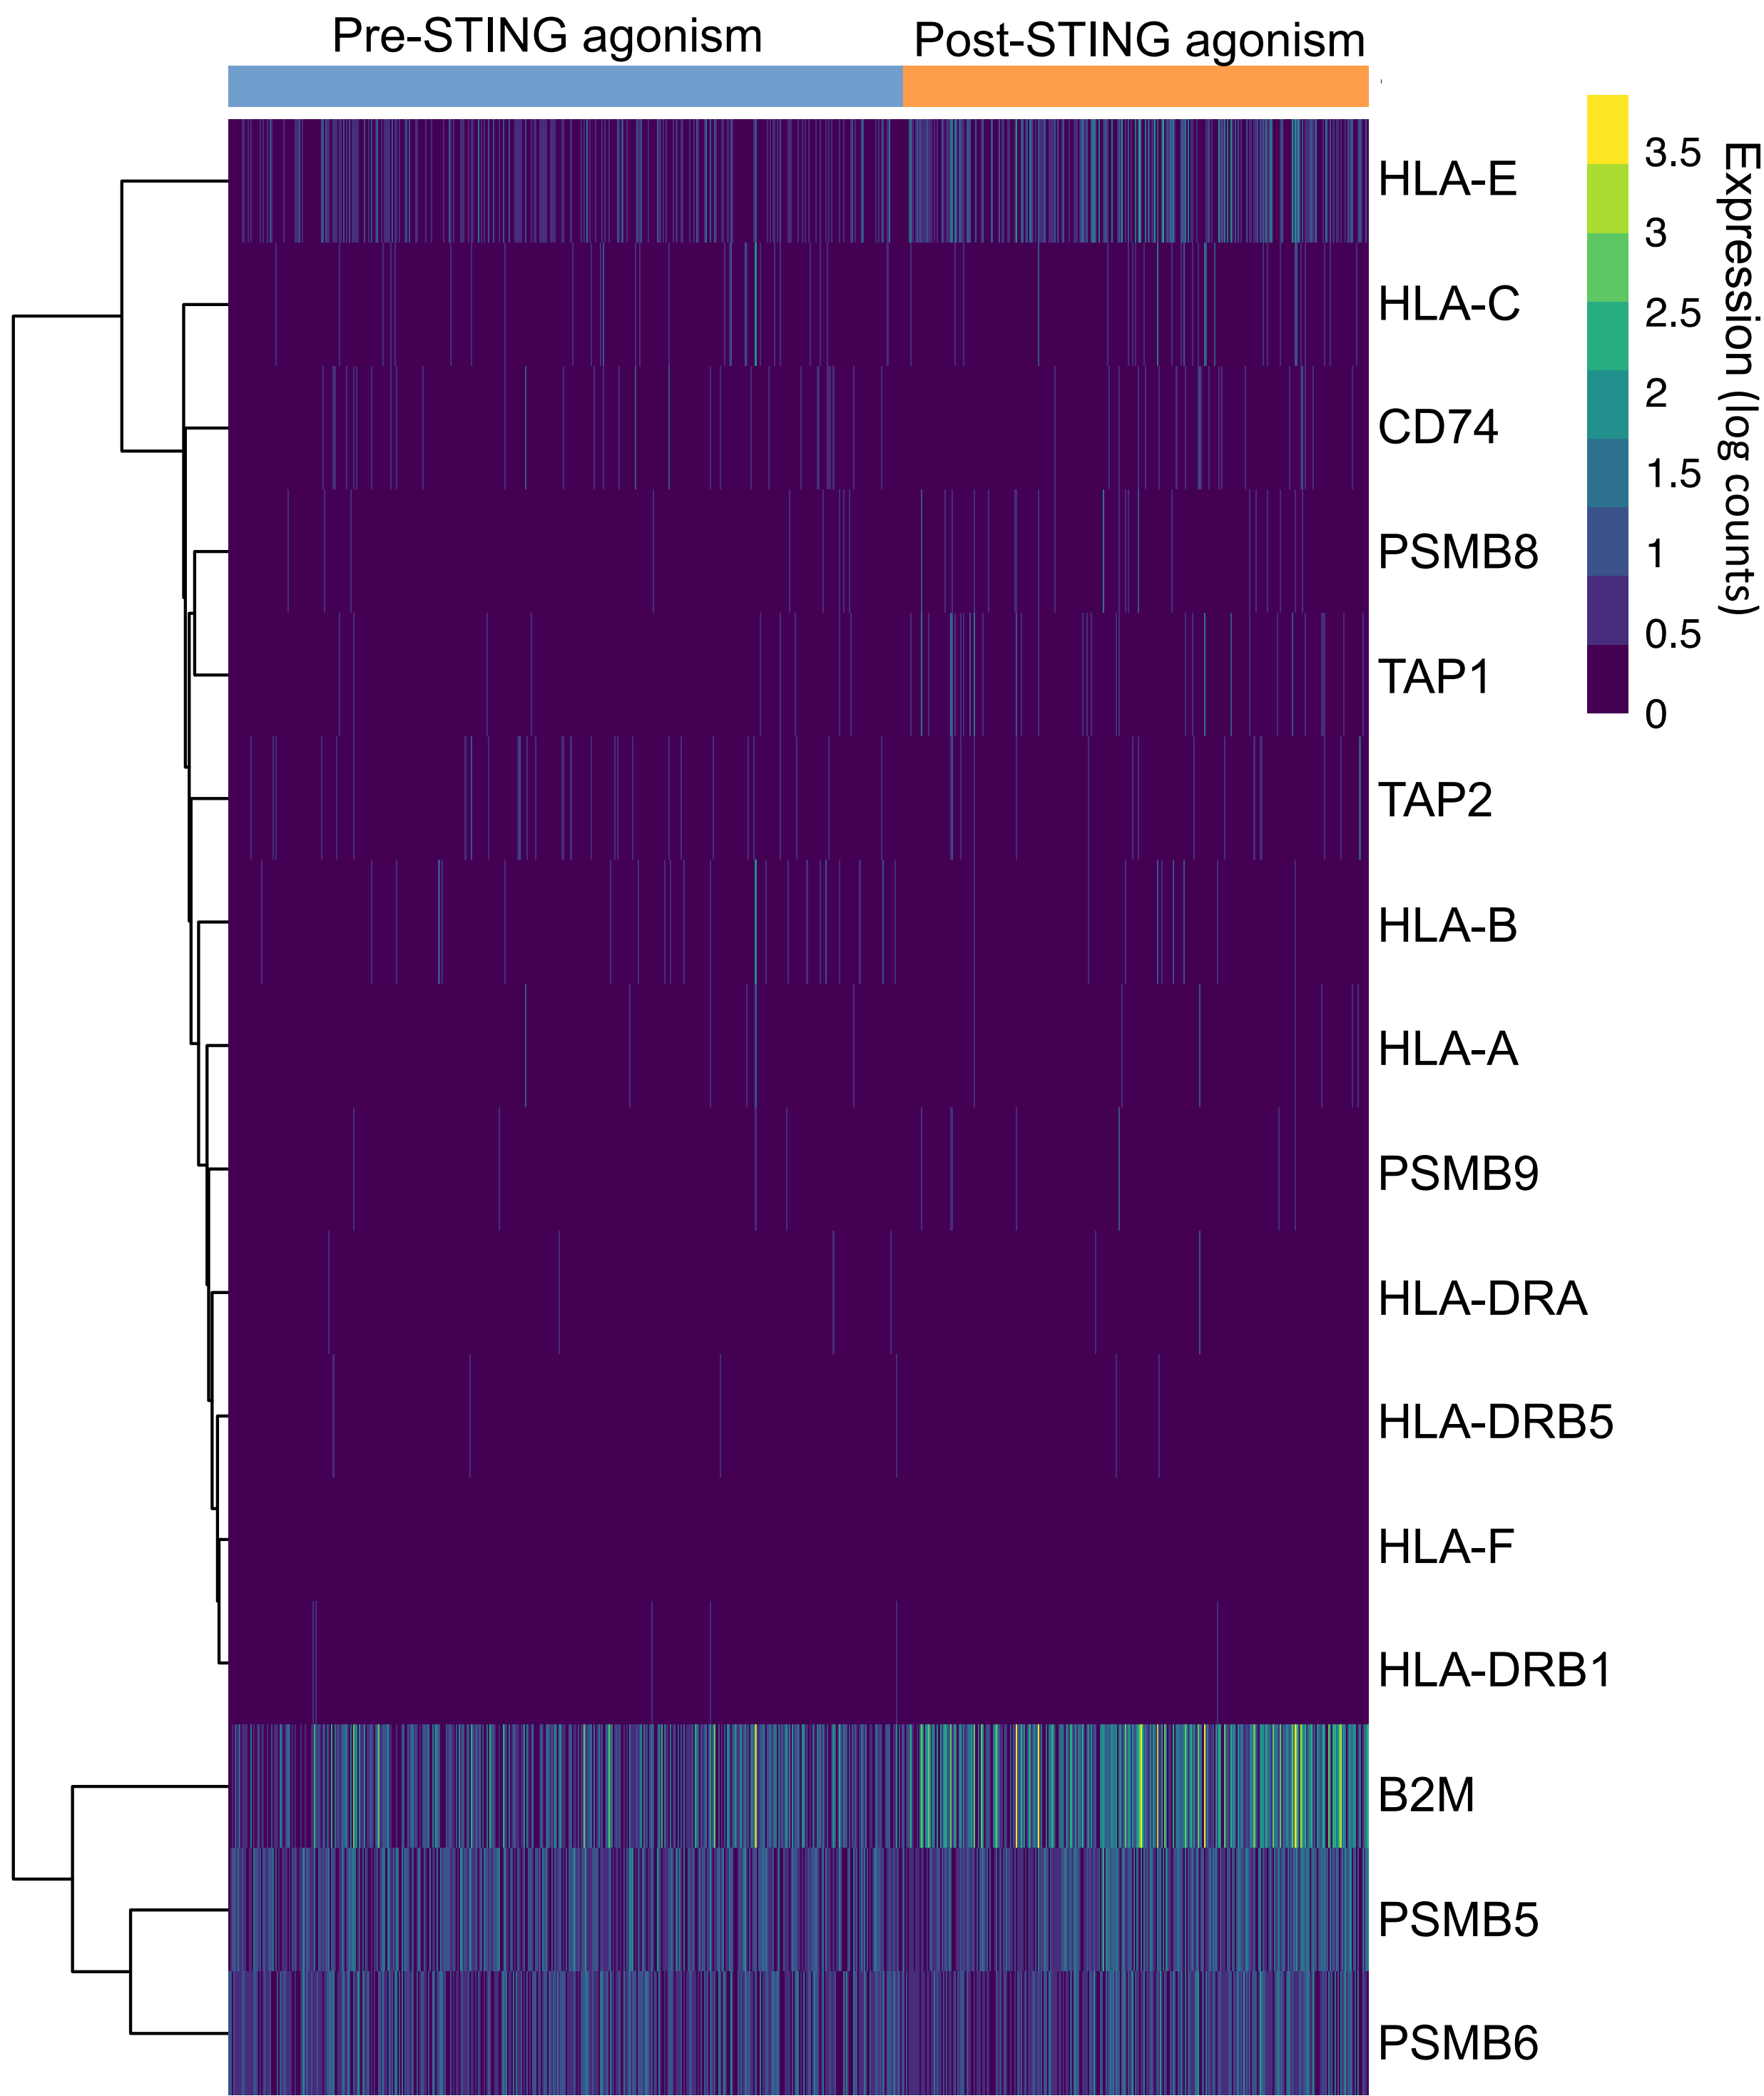

**Supplemental Figure 5. Antigen presentation genes increase following STING agonism.** Each row represents an individual tumor cell grouped by pre- or post-STING agonism (color on top of heatmap). Genes selected from Biocarta<sup>34</sup> antigen presentation gene set.
